# Supplementary material for: Genome-wide association defines more than 30 distinct susceptibility loci for Crohn's disease
Source: Springer Nature journal article supplement (doi:10.1038/ng.175), 2008-06-29

**Genome-wide association defines more than thirty distinct susceptibility loci for  
Crohn's disease [Supplementary Information]**

Jeffrey C. Barrett<sup>1</sup>, Sarah Hansoul<sup>2</sup>, Dan L. Nicolae<sup>3</sup>, Judy H. Cho<sup>4</sup>, Richard H. Duerr<sup>5,6</sup>, John D. Rioux<sup>7,8</sup>, Steven R. Brant<sup>9,10</sup>, Mark S. Silverberg<sup>11</sup>, Kent D. Taylor<sup>12</sup>, M. Michael Barmada<sup>5</sup>, Alain Bitton<sup>13</sup>, Themistocles Dassopoulos<sup>9</sup>, Lisa Wu Datta<sup>9</sup>, Todd Green<sup>8</sup>, Anne M. Griffiths<sup>14</sup>, Emily O. Kistner<sup>15</sup>, Michael T. Murtha<sup>4</sup>, Miguel D. Regueiro<sup>6</sup>, Jerome I. Rotter<sup>12</sup>, L. Philip Schumm<sup>15</sup>, A. Hillary Steinhart<sup>11</sup>, Stephan R. Targan<sup>12</sup>, Ramnik J. Xavier<sup>16</sup>, the NIDDK IBD Genetics Consortium, Cécile Libioulle<sup>2</sup>, Cynthia Sandor<sup>2</sup>, Mark Lathrop<sup>17</sup>, Jacques Belaiche<sup>18</sup>, Olivier Dewit<sup>19</sup>, Ivo Gut<sup>17</sup>, Simon Heath<sup>17</sup>, Debby Laukens<sup>20</sup>, Myriam Mni<sup>2</sup>, Paul Rutgeerts<sup>21</sup>, André Van Gossum<sup>22</sup>, Diana Zelenika<sup>17</sup>, Denis Franchimont<sup>22</sup>, JP Hugot<sup>23</sup>, Martine de Vos<sup>20</sup>, Severine Vermeire<sup>21</sup>, Edouard Louis<sup>18</sup>, the Belgian-French IBD consortium, the Wellcome Trust Case Control Consortium, Lon R. Cardon<sup>1</sup>, Carl A. Anderson<sup>1</sup>, Hazel Drummond<sup>24</sup>, Elaine Nimmo<sup>24</sup>, Tariq Ahmad<sup>25</sup>, Natalie J Prescott<sup>26</sup>, Clive M. Onnie<sup>26</sup>, Sheila A. Fisher<sup>26</sup>, Jonathan Marchini<sup>27</sup>, Jilur Ghorri<sup>28</sup>, Suzannah Bumpstead<sup>28</sup>, Rhian Gwillam<sup>28</sup>, Mark Tremelling<sup>29</sup>, Panos Deloukas<sup>28</sup>, John Mansfield<sup>30</sup>, Derek Jewell<sup>31</sup>, Jack Satsangi<sup>24</sup>, Christopher G. Mathew<sup>26</sup>, Miles Parkes<sup>29</sup>, Michel Georges<sup>2</sup>, Mark J. Daly<sup>8,32</sup>

<sup>1</sup>Bioinformatics and Statistical Genetics, Wellcome Trust Centre for Human Genetics, University of Oxford, Roosevelt Drive, Oxford OX3 7BN, UK

<sup>2</sup>Unit of Animal Genomics, GIGA-R & Faculty of Veterinary Medicine, University of Liège, Belgium

<sup>3</sup>University of Chicago, Department of Medicine, 5801 South Ellis, Chicago, Illinois 60637, USA

<sup>4</sup>Yale University, Departments of Medicine and Genetics, Division of Gastroenterology, Inflammatory Bowel Disease (IBD) Center, 300 Cedar Street, New Haven, Connecticut 06519, USA.

<sup>5</sup>University of Pittsburgh, Graduate School of Public Health, Department of Human Genetics, 130 Desoto Street, Pittsburgh, Pennsylvania 15261, USA.

<sup>6</sup>University of Pittsburgh, School of Medicine, Department of Medicine, Division of Gastroenterology, Hepatology and Nutrition, University of Pittsburgh Medical Center (UPMC) Presbyterian, 200 Lothrop Street, Pittsburgh, Pennsylvania 15213, USA.

<sup>7</sup>Université de Montréal and the Montreal Heart Institute, Research Center, 5000 rue Belanger, Montreal, Quebec H1T 1C8, Canada.

<sup>8</sup>The Broad Institute of MIT and Harvard, 7 Cambridge Center, Cambridge, Massachusetts 02142, USA.

<sup>9</sup>Johns Hopkins University, Department of Medicine, Harvey M. and Lyn P. Meyerhoff Inflammatory Bowel Disease Center, 1503 East Jefferson Street, Baltimore, Maryland 21231, USA.

<sup>10</sup>Johns Hopkins University, Bloomberg School of Public Health, Department of Epidemiology, 615 E. Wolfe Street, Baltimore, Maryland 21205, USA.

<sup>11</sup>Mount Sinai Hospital IBD Centre, University of Toronto, 441-600 University Avenue, Toronto, Ontario M5G 1X5, Canada.

<sup>12</sup>Medical Genetics Institute and Inflammatory Bowel Disease (IBD) Center, Cedars-Sinai Medical Center, 8700 W. Beverly Blvd., Los Angeles, California 90048, USA.

<sup>13</sup>Department of Medicine, Royal Victoria Hospital, McGill University, Montreal, Quebec, H3A 1A1, Canada

- <sup>14</sup>The Hospital for Sick Children, University of Toronto, 555 University Avenue, Toronto, Ontario M5G 1X8, Canada.
- <sup>15</sup>University of Chicago, Department of Health Studies, 5841 S. Maryland Avenue, Chicago, Illinois 60637, USA.
- <sup>16</sup>Gastrointestinal Unit and Center for Computational and Integrative Biology, Massachusetts General Hospital, Harvard Medical School, 185 Cambridge Street, Boston, Massachusetts 02114, USA
- <sup>17</sup>Centre National de Génotypage, Evry, France.
- <sup>18</sup>Unit of Hepatology and Gastroenterology, Department of Clinical Sciences, GIGA-R, Faculty of Medicine and CHU de Liège, University of Liège, Belgium
- <sup>19</sup>Department of gastroenterology, Clinique universitaire St Luc, UCL, Brussels, Belgium
- <sup>20</sup>Department of Hepatology and Gastroenterology, Ghent University Hospital, Belgium
- <sup>21</sup>Department of Gastroenterology, University Hospital Leuven, Belgium
- <sup>22</sup>Department of Gastroenterology, Erasmus Hospital, Free University of Brussels, Belgium
- <sup>23</sup>INSERM; Université Paris Diderot; Assistance Publique Hôpitaux de Paris; Hopital Robert Debré, Paris, France.
- <sup>24</sup>Gastrointestinal Unit, Division of Medical Sciences, School of Molecular and Clinical Medicine, University of Edinburgh, Western General Hospital, Edinburgh EH4 2XU, UK
- <sup>25</sup>Peninsula Medical School, Barrack Road, Exeter , EX2 5DW
- <sup>26</sup>Department of Medical and Molecular Genetics, King's College London School of Medicine, 8th Floor Guy's Tower, Guy's Hospital, London, SE1 9RT, UK
- <sup>27</sup>Department of Statistics, University of Oxford, 1 South Parks Road, Oxford OX1 3TG, UK.
- <sup>28</sup>The Wellcome Trust Sanger Institute, Wellcome Trust Genome Campus, Hinxton, Cambridge CB10 1SA, UK
- <sup>29</sup>IBD research group, Addenbrooke's Hospital, University of Cambridge, Cambridge CB2 2QQ, UK
- <sup>30</sup>Department of Gastroenterology & Hepatology, University of Newcastle upon Tyne, Royal Victoria Infirmary, Newcastle upon Tyne NE1 4LP, UK
- <sup>31</sup>Gastroenterology Unit, Radcliffe Infirmary, University of Oxford, Oxford, OX2 6HE, UK
- <sup>32</sup>Center for Human Genetic Research, Massachusetts General Hospital, Harvard Medical School, 185 Cambridge Street, Boston, Massachusetts 02114, USA.

## Supplementary Tables

**Supplementary Table 1: 129 SNPs from 74 distinct loci followed up in replication**

samples

| Locus | SNP        | Chr | Position  | Scan     | p values    |          | Replication data? |   |   |   |
|-------|------------|-----|-----------|----------|-------------|----------|-------------------|---|---|---|
|       |            |     |           |          | Replication | Combined | N                 | U | B | F |
| 1     | rs11465804 | 1   | 67414547  | 5.05E-36 | 3.1E-29     | 3.33E-63 | 1                 | 1 | 1 | 1 |
| 1     | rs11209026 | 1   | 67417979  | 3.19E-34 | 1.5E-36     | 2.15E-68 | 1                 | 1 | 1 | 1 |
| 1     | rs11805303 | 1   | 67387537  | 1.35E-24 | 5.62E-17    | 1.82E-39 | 1                 | 1 |   |   |
| 2     | rs2066844  | 16  | 49303427  | NAN      | NAN         | NAN      |                   |   |   |   |
| 2     | rs2066845  | 16  | 49314041  | NAN      | 4.62E-08    | 4.62E-08 | 1                 | 1 |   |   |
| 2     | rs2066847  | 16  | 49321280  | NAN      | 1.49E-24    | 1.49E-24 | 1                 | 1 |   |   |
| 3     | rs4613763  | 5   | 40428485  | 2.51E-22 | 2.79E-08    | 3.09E-27 | 1                 | 1 | 1 | 1 |
| 3     | rs17234657 | 5   | 40437266  | 2.26E-22 | 3.18E-08    | 3.41E-27 | 1                 | 1 | 1 | 1 |
| 4     | rs2241880  | 2   | 233965368 | 1.28E-21 | 3.66E-05    | 4.61E-25 | 1                 |   |   |   |
| 4     | rs3828309  | 2   | 233962410 | 5.66E-21 | 7.67E-14    | 1.18E-32 | 1                 | 1 | 1 | 1 |
| 5     | rs10995271 | 10  | 64108492  | 9.51E-12 | 1.61E-10    | 2.23E-20 |                   | 1 | 1 | 1 |
| 6     | rs2542151  | 18  | 12769947  | 5.95E-12 | 2.41E-07    | 2.55E-17 | 1                 | 1 | 1 | 1 |
| 6     | rs1893217  | 18  | 12799340  | 3.27E-11 | 1.23E-06    | 7.05E-16 | 1                 | 1 | 1 | 1 |
| 7     | rs11190140 | 10  | 101281583 | 8.53E-11 | 1.69E-07    | 1.53E-16 | 1                 | 1 | 1 |   |
| 7     | rs10883371 | 10  | 101282445 | 9.09E-11 | 3.1E-07     | 3.05E-16 | 1                 | 1 | 1 |   |
| 8     | rs11747270 | 5   | 150239060 | 3.18E-11 | 2.57E-07    | 1.7E-16  | 1                 | 1 | 1 | 1 |
| 8     | rs13361189 | 5   | 150203580 | 4.09E-11 | 7.47E-07    | 7.33E-16 | 1                 | 1 | 1 | 1 |
| 9     | rs2188962  | 5   | 131798704 | 2.29E-09 | 3.52E-11    | 1.16E-18 | 1                 | 1 | 1 | 1 |
| 9     | rs1050152  | 5   | 131704219 | NAN      | 1.54E-06    | 1.54E-06 | 1                 | 1 | 1 |   |
| 10    | rs2024092  | 19  | 1075031   | 6.48E-09 | 0.021       | 1.18E-09 |                   | 1 |   |   |
| 10    | rs4807569  | 19  | 1074378   | 5.8E-09  | 0.00347     | 1.06E-09 | 1                 | 1 | 1 | 1 |
| 11    | rs10045431 | 5   | 158747111 | 4.4E-09  | 3.66E-06    | 1.93E-13 | 1                 | 1 | 1 | 1 |
| 12    | rs3763313  | 6   | 32484449  | 7.23E-09 | 0.00602     | 2.6E-09  | 1                 | 1 | 1 | 1 |
| 12    | rs2858331  | 6   | 32789255  | 1.53E-08 | 0.00382     | 2.17E-09 | 1                 | 1 | 1 | 1 |
| 13    | rs3924462  | 3   | 49499240  | 2.42E-08 | 0.194       | 3.56E-08 | 1                 |   |   |   |
| 13    | rs6784820  | 3   | 49425868  | 2.84E-08 | 0.107       | 1.2E-07  | 1                 | 1 |   |   |
| 13    | rs3197999  | 3   | 49696536  | 1.08E-07 | 5.64E-07    | 5.76E-13 | 1                 | 1 | 1 | 1 |
| 13    | rs9858542  | 3   | 49676987  | 9.47E-08 | 2.24E-06    | 3.55E-12 |                   |   | 1 | 1 |
| 14    | rs3764147  | 13  | 43355925  | 8.04E-08 | 1.33E-07    | 1.04E-13 | 1                 | 1 | 1 | 1 |
| 14    | rs9562532  | 13  | 43497789  | 6.9E-07  | 0.00882     | 1.44E-07 | 1                 | 1 | 1 | 1 |
| 15    | rs11175593 | 12  | 38888207  | 6.64E-08 | 0.000165    | 1.54E-10 | 1                 | 1 | 1 | 1 |
| 15    | rs11564144 | 12  | 39104262  | 8.95E-08 | 6.55E-05    | 6.36E-11 | 1                 | 1 | 1 | 1 |
| 16    | rs6908425  | 6   | 20836710  | 1.26E-07 | 0.000278    | 4.48E-10 | 1                 | 1 | 1 | 1 |
| 16    | rs7748720  | 6   | 20797924  | 1.83E-07 | 0.0288      | 1.64E-07 |                   | 1 | 1 | 1 |
| 17    | rs7927894  | 11  | 75978964  | 7.16E-08 | 0.000732    | 6.6E-10  |                   | 1 | 1 | 1 |
| 18    | rs2301436  | 6   | 167408399 | 1.65E-07 | 3.26E-07    | 5.22E-13 | 1                 | 1 | 1 | 1 |
| 18    | rs7749278  | 6   | 167405736 | 1.65E-07 | 0.00121     | 1.58E-09 | 1                 | 1 |   |   |
| 19    | rs9286879  | 1   | 169593891 | 2.01E-07 | 0.000321    | 7.66E-10 | 1                 | 1 | 1 | 1 |
| 19    | rs10489276 | 1   | 169594596 | 1.9E-07  | 0.026       | 9.01E-08 | 1                 |   | 1 | 1 |
| 20    | rs4263839  | 9   | 114645994 | 1.96E-07 | 6.58E-05    | 1.3E-10  | 1                 | 1 | 1 | 1 |

|    |            |    |           |          |          |          |   |   |   |   |
|----|------------|----|-----------|----------|----------|----------|---|---|---|---|
| 20 | rs6478109  | 9  | 114648320 | 1.31E-07 | 0.00422  | 3.67E-09 | 1 |   |   |   |
| 21 | rs2738758  | 20 | 61820069  | 2.04E-07 | 0.33     | 2.66E-06 |   |   | 1 | 1 |
| 21 | rs2297441  | 20 | 61798026  | 7.6E-07  | 0.000138 | 1.3E-09  |   | 1 |   |   |
| 22 | rs11584383 | 1  | 197667523 | 3.41E-07 | 2.34E-06 | 7.17E-12 | 1 | 1 | 1 | 1 |
| 22 | rs2297909  | 1  | 197691964 | 9.69E-07 | 0.0001   | 8.1E-10  | 1 | 1 |   |   |
| 23 | rs9545740  | 13 | 80973593  | 2.64E-07 | 0.0329   | 0.000554 |   |   | 1 | 1 |
| 23 | rs6563216  | 13 | 80961793  | 1.61E-07 | 0.372    | 0.000223 | 1 | 1 | 1 | 1 |
| 24 | rs2274910  | 1  | 157665119 | 1.75E-07 | 0.000481 | 7.3E-10  |   | 1 | 1 | 1 |
| 24 | rs11265519 | 1  | 157691986 | 2.98E-07 | 0.0277   | 3.82E-07 |   | 1 | 1 | 1 |
| 25 | rs2283790  | 22 | 20281207  | 8.65E-07 | 0.493    | 4.55E-05 | 1 | 1 |   |   |
| 25 | rs5754217  | 22 | 20264229  | 1.25E-06 | 0.325    | 6.26E-06 |   | 1 |   |   |
| 26 | rs12529198 | 6  | 5096246   | 3.54E-07 | 0.0192   | 3.48E-07 | 1 | 1 | 1 | 1 |
| 27 | rs12604993 | 18 | 75866208  | 1.38E-06 | 0.256    | 0.00028  | 1 | 1 |   |   |
| 27 | rs12607007 | 18 | 75865061  | 2.11E-06 | 0.108    | 0.00692  | 1 | 1 | 1 | 1 |
| 28 | rs6128541  | 20 | 57351084  | 1.73E-06 | 0.101    | 1.18E-05 | 1 | 1 | 1 | 1 |
| 29 | rs12985909 | 19 | 18300383  | 5.43E-08 | 0.0526   | 7.54E-07 | 1 | 1 | 1 | 1 |
| 30 | rs2872507  | 17 | 35294289  | 1.06E-06 | 0.000292 | 2.5E-09  |   | 1 | 1 | 1 |
| 30 | rs2305480  | 17 | 35315722  | 3.41E-06 | 0.419    | 5.45E-05 |   | 1 |   |   |
| 31 | rs17309827 | 6  | 3378317   | 1.04E-06 | 0.0391   | 1.37E-06 | 1 | 1 | 1 | 1 |
| 31 | rs4959830  | 6  | 3379241   | 1.15E-06 | 0.0582   | 2.83E-06 | 1 | 1 | 1 | 1 |
| 32 | rs5974     | 4  | 187576360 | 1.35E-06 | 0.0865   | 7.81E-06 | 1 | 1 | 1 | 1 |
| 32 | rs4253431  | 4  | 187585769 | 1.34E-06 | 0.107    | 1.33E-05 | 1 | 1 | 1 | 1 |
| 33 | rs707472   | 1  | 7840274   | 1.47E-06 | 0.0541   | 3.63E-06 | 1 | 1 | 1 | 1 |
| 33 | rs707458   | 1  | 7766478   | 1.45E-05 | 0.211    | 6.82E-05 | 1 |   | 1 | 1 |
| 34 | rs10512670 | 5  | 37949301  | 1.74E-06 | 0.273    | 2.41E-05 | 1 |   | 1 | 1 |
| 34 | rs11959616 | 5  | 37948752  | 1.06E-05 | 0.441    | 0.000478 |   | 1 | 1 | 1 |
| 35 | rs921720   | 8  | 126603853 | 1.9E-06  | 0.000182 | 2.78E-09 | 1 | 1 |   |   |
| 35 | rs1551398  | 8  | 126609233 | 2.45E-06 | 0.000109 | 2.25E-09 | 1 | 1 | 1 | 1 |
| 36 | rs744166   | 17 | 37767727  | 2.97E-06 | 9.15E-08 | 3.41E-12 | 1 | 1 | 1 | 1 |
| 36 | rs12948909 | 17 | 37824128  | 7.42E-06 | 0.0074   | 7.1E-07  | 1 | 1 | 1 | 1 |
| 37 | rs10753415 | 1  | 222692358 | 2.73E-06 | 0.393    | 5.08E-05 | 1 | 1 |   |   |
| 38 | rs991804   | 17 | 29611838  | 2.01E-06 | 0.0135   | 5.34E-07 | 1 | 1 | 1 | 1 |
| 38 | rs8064381  | 17 | 29849794  | 1.25E-05 | 0.0961   | 1.01E-05 |   |   | 1 | 1 |
| 39 | rs158865   | 18 | 54054001  | 5.56E-06 | 0.207    | 1.97E-05 | 1 | 1 |   |   |
| 39 | rs158862   | 18 | 54054701  | 9.4E-06  | 0.195    | 0.00528  | 1 | 1 | 1 | 1 |
| 40 | rs17582416 | 10 | 35327656  | 4.24E-06 | 2.53E-05 | 8.93E-10 |   | 1 | 1 | 1 |
| 40 | rs3936503  | 10 | 35589263  | 6.05E-06 | 0.000176 | 8.04E-09 |   | 1 | 1 | 1 |
| 41 | rs7759649  | 6  | 21578398  | 4.97E-06 | 0.0678   | 5.02E-06 | 1 |   | 1 | 1 |
| 41 | rs11758386 | 6  | 21565929  | 1.09E-05 | 0.123    | 3.4E-05  | 1 | 1 | 1 |   |
| 42 | rs7161377  | 14 | 75071147  | 4.71E-06 | 0.152    | 2.25E-05 |   | 1 | 1 | 1 |
| 42 | rs175718   | 14 | 75056332  | 1.28E-05 | 0.331    | 0.000222 | 1 |   | 1 | 1 |
| 43 | rs7758080  | 6  | 149618772 | 3.64E-06 | 0.044    | 4.39E-06 | 1 | 1 | 1 | 1 |
| 44 | rs559928   | 11 | 63906946  | 4.74E-06 | 0.245    | 7.44E-06 | 1 |   |   |   |
| 44 | rs596308   | 11 | 63967228  | 1.6E-05  | 0.0882   | 3.45E-05 | 1 | 1 | 1 | 1 |
| 45 | rs10863202 | 16 | 84545499  | 4.74E-06 | 0.226    | 1.4E-05  |   |   | 1 | 1 |
| 45 | rs1915033  | 16 | 84542932  | 0.000344 | 0.278    | 0.00239  | 1 |   |   |   |
| 46 | rs1200610  | 1  | 181883035 | 1.04E-05 | 0.388    | 0.000932 |   | 1 | 1 | 1 |
| 47 | rs4073149  | 15 | 72685472  | 5.81E-06 | 0.0771   | 0.0127   | 1 | 1 | 1 | 1 |
| 47 | rs7497036  | 15 | 72660732  | 7.44E-06 | 0.273    | 0.00133  |   | 1 | 1 | 1 |

|    |            |    |           |          |          |          |   |   |   |   |
|----|------------|----|-----------|----------|----------|----------|---|---|---|---|
| 48 | rs10758669 | 9  | 4971602   | 3.4E-07  | 0.00043  | 1.73E-09 | 1 | 1 | 1 |   |
| 48 | rs7849191  | 9  | 4978761   | 1.96E-06 | 0.00162  | 4.34E-08 | 1 | 1 | 1 |   |
| 49 | rs743479   | 21 | 44436378  | 5.21E-06 | 0.000361 | 1.43E-08 | 1 | 1 |   |   |
| 49 | rs762421   | 21 | 44439989  | 5.41E-06 | 1.59E-05 | 7.04E-10 | 1 | 1 | 1 | 1 |
| 50 | rs13003464 | 2  | 61098480  | 3.82E-06 | 0.00565  | 1.57E-07 | 1 | 1 |   |   |
| 50 | rs10188217 | 2  | 61129193  | 3.07E-06 | 0.0028   | 6.36E-08 | 1 | 1 |   |   |
| 51 | rs7746082  | 6  | 106541962 | 1.85E-06 | 7.7E-06  | 1.22E-10 | 1 | 1 | 1 | 1 |
| 52 | rs6743984  | 2  | 230934834 | 7.59E-06 | 0.0544   | 2.48E-06 |   | 1 |   |   |
| 52 | rs13397985 | 2  | 230916728 | 8.93E-06 | 0.0843   | 9.04E-06 | 1 | 1 |   |   |
| 53 | rs2836757  | 21 | 39215894  | 8.73E-06 | 0.263    | 0.000165 | 1 | 1 | 1 | 1 |
| 54 | rs11931489 | 4  | 7649390   | 3.24E-06 | 0.352    | 5.27E-05 | 1 | 1 |   |   |
| 55 | rs2688610  | 10 | 75324937  | 1.12E-05 | 0.104    | 3.32E-05 | 1 | 1 | 1 | 1 |
| 55 | rs2675671  | 10 | 75302766  | 1.23E-05 | 0.0314   | 3.03E-06 | 1 | 1 |   |   |
| 56 | rs12827915 | 12 | 13070503  | 8.89E-06 | 0.435    | 0.000327 | 1 | 1 |   |   |
| 56 | rs3825272  | 12 | 13046606  | 4.05E-05 | 0.455    | 0.000751 | 1 | 1 |   |   |
| 57 | rs1260326  | 2  | 27642591  | 3.44E-05 | 0.0108   | 2.3E-06  | 1 | 1 |   |   |
| 57 | rs780094   | 2  | 27652888  | 3.62E-05 | 0.00381  | 1.15E-06 | 1 | 1 | 1 | 1 |
| 58 | rs6708413  | 2  | 102521887 | 1.02E-05 | 0.016    | 1.45E-06 | 1 |   | 1 | 1 |
| 58 | rs917997   | 2  | 102529086 | 1.08E-05 | 0.0493   | 1.11E-05 | 1 | 1 | 1 | 1 |
| 59 | rs7227145  | 18 | 59311578  | 1.01E-05 | 0.498    | 0.000948 | 1 | 1 | 1 | 1 |
| 60 | rs1736020  | 21 | 15734423  | 1E-05    | 0.000444 | 3.36E-08 | 1 | 1 |   |   |
| 60 | rs1736135  | 21 | 15727091  | 1.03E-05 | 4.58E-05 | 3.7E-09  | 1 | 1 | 1 | 1 |
| 61 | rs1040092  | 12 | 58052436  | 1.14E-05 | 0.289    | 0.00345  | 1 | 1 | 1 | 1 |
| 61 | rs1996199  | 12 | 58059725  | 2.84E-05 | 0.149    | 3.97E-05 |   |   | 1 | 1 |
| 62 | rs4543904  | 10 | 1453158   | 7.72E-06 | 0.29     | 0.000756 | 1 | 1 |   |   |
| 63 | rs9319943  | 18 | 55030807  | 1.75E-05 | 0.304    | 0.00106  | 1 | 1 |   |   |
| 63 | rs9961822  | 18 | 55028896  | 8.34E-06 | 0.356    | 0.0018   | 1 | 1 | 1 | 1 |
| 64 | rs8098673  | 18 | 17927329  | 1.59E-05 | 0.0443   | 1.44E-05 | 1 | 1 | 1 | 1 |
| 65 | rs1456896  | 7  | 50081722  | 1.58E-05 | 9.41E-06 | 1.39E-09 | 1 | 1 | 1 |   |
| 65 | rs1456893  | 7  | 50046933  | 2.46E-05 | 1.1E-05  | 2.3E-09  | 1 | 1 | 1 | 1 |
| 66 | rs2944533  | 10 | 132842492 | 2.65E-05 | 0.441    | 0.000388 | 1 | 1 |   |   |
| 67 | rs10010325 | 4  | 106463957 | 6.25E-06 | 0.271    | 5.03E-05 | 1 | 1 |   |   |
| 68 | rs9829140  | 3  | 133674827 | 6.84E-06 | 0.161    | 6.21E-05 | 1 | 1 | 1 | 1 |
| 69 | rs6679677  | 1  | 114015850 | 7.75E-06 | 8.25E-05 | 4.95E-09 |   | 1 | 1 | 1 |
| 69 | rs2476601  | 1  | 114089610 | 9.05E-06 | 0.000101 | 7.3E-09  | 1 | 1 | 1 | 1 |
| 70 | rs8111071  | 19 | 50999246  | 1.95E-05 | 0.46     | 0.00132  | 1 | 1 | 1 |   |
| 71 | rs17814449 | 7  | 130385443 | 1.24E-05 | 0.381    | 0.000964 | 1 | 1 | 1 | 1 |
| 72 | rs6987445  | 8  | 83235127  | 1.32E-05 | 0.223    | 0.000128 |   | 1 | 1 | 1 |
| 73 | rs3011410  | 10 | 122495603 | 2.08E-05 | 0.363    | 0.000198 | 1 | 1 |   |   |
| 74 | rs1784493  | 8  | 107743073 | 2.59E-05 | 0.143    | 0.0136   | 1 | 1 | 1 | 1 |
| 74 | rs1580428  | 8  | 107779719 | 2.92E-05 | 0.314    | 0.00278  |   | 1 | 1 | 1 |

Final four columns show success of replication experiments: **N** - North American family samples, **U** - UK unrelated case/control samples, **B** - Belgian unrelated case/control samples, **F** - French family samples.

**Supplementary Table 2: Nominally significant SNP-SNP interactions**

| SNP1       | SNP2       | P         |
|------------|------------|-----------|
| rs11265519 | rs4613763  | 0.0496    |
| rs11265519 | rs2188962  | 0.001713  |
| rs11265519 | rs3764147  | 0.007312  |
| rs9286879  | rs13003464 | 0.0368    |
| rs9286879  | rs1456893  | 0.04274   |
| rs9286879  | rs7849191  | 0.006887  |
| rs11584383 | rs6743984  | 0.01683   |
| rs11584383 | rs11747270 | 0.0243    |
| rs780094   | rs917997   | 0.03249   |
| rs780094   | rs6784820  | 0.02849   |
| rs780094   | rs7746082  | 0.04362   |
| rs780094   | rs1456893  | 0.00265   |
| rs780094   | rs7849191  | 0.04246   |
| rs780094   | rs10995271 | 0.02404   |
| rs780094   | rs744166   | 0.02902   |
| rs780094   | rs2542151  | 0.00169   |
| rs780094   | rs4807569  | 0.02133   |
| rs13003464 | rs2301436  | 0.02274   |
| rs13003464 | rs10995271 | 0.04577   |
| rs13003464 | rs2542151  | 0.01959   |
| rs917997   | rs6784820  | 0.02225   |
| rs917997   | rs4613763  | 0.03703   |
| rs917997   | rs7758080  | 0.02673   |
| rs917997   | rs17582416 | 0.02064   |
| rs917997   | rs8098673  | 0.01276   |
| rs6743984  | rs17582416 | 0.03731   |
| rs3828309  | rs2301436  | 0.03148   |
| rs3828309  | rs1736135  | 0.02527   |
| rs6784820  | rs7758080  | 0.0327    |
| rs6784820  | rs2301436  | 0.04931   |
| rs6784820  | rs10995271 | 0.03066   |
| rs6784820  | rs3764147  | 0.008501  |
| rs4613763  | rs7758080  | 0.0006182 |
| rs2188962  | rs7758080  | 0.02726   |
| rs2188962  | rs2872507  | 8.17E-05  |
| rs11747270 | rs2301436  | 0.03407   |
| rs11747270 | rs2872507  | 0.03232   |
| rs11747270 | rs1736135  | 0.04903   |
| rs17309827 | rs6908425  | 0.02921   |
| rs17309827 | rs2542151  | 0.01143   |
| rs17309827 | rs1736135  | 0.04143   |
| rs12529198 | rs17582416 | 0.04465   |
| rs12529198 | rs2066847  | 0.02834   |
| rs6908425  | rs1456893  | 0.04442   |
| rs6908425  | rs762421   | 0.002305  |
| rs11758386 | rs1456893  | 0.03435   |

|            |            |           |
|------------|------------|-----------|
| rs7746082  | rs7849191  | 0.001362  |
| rs7746082  | rs4263839  | 0.02635   |
| rs7746082  | rs10995271 | 0.01366   |
| rs7746082  | rs8098673  | 0.03668   |
| rs7758080  | rs3764147  | 0.03878   |
| rs7849191  | rs17582416 | 0.0345    |
| rs7849191  | rs2542151  | 0.008799  |
| rs17582416 | rs11190140 | 0.025     |
| rs10995271 | rs6128541  | 0.02217   |
| rs11190140 | rs2542151  | 0.0007632 |
| rs2066847  | rs991804   | 0.04447   |
| rs2066847  | rs2872507  | 0.001565  |
| rs991804   | rs8098673  | 0.002871  |
| rs2872507  | rs6128541  | 0.04778   |
| rs744166   | rs2542151  | 0.02249   |
| rs2542151  | rs8098673  | 0.04003   |
| rs8098673  | rs762421   | 0.01574   |

**Supplementary Table 3: Crohn's risk loci containing a highly correlated non-synonymous SNP.**

| <b>Chr</b> | <b>Position (Mb)</b> | <b>Gene(s)</b>         | <b>nsSNP(s)</b>                                                                       |
|------------|----------------------|------------------------|---------------------------------------------------------------------------------------|
| 1          | 67.4                 | <i>IL23R</i>           | rs11209026                                                                            |
| 1          | 113.79 - 114.17      | <i>PTPN22, DCLRE1B</i> | rs2476601, rs12022378                                                                 |
| 2          | 230.9                | <i>ATG16L1</i>         | rs2241880                                                                             |
| 3          | 48.73 - 49.87        | <i>MST1</i>            | rs3197999                                                                             |
| 5          | 131.44 - 131.90      | <i>SLC22A4</i>         | rs2631367                                                                             |
| 12         | 38.61 - 39.31        | <i>MUC19</i>           | rs4768252, rs4768253, rs2114566,<br>rs17467164, rs11564170,<br>rs10506156, rs11564125 |
| 13         | 43.13 - 43.54        | <i>C13orf31</i>        | rs3764147                                                                             |
| 16         | 49.3                 | <i>NOD2</i>            | rs2066844, rs2066845, rs2066847                                                       |
| 17         | 34.63 - 35.34        | <i>GSDML</i>           | rs2305480, rs2305479                                                                  |



**Supplementary Table 4: cis-eQTL effects for CD associated SNPs**

| <b>SNP</b> | <b>Chr</b> | <b>Gene</b> | <b>LOD score</b> | <b>Distance SNP-gene</b> |
|------------|------------|-------------|------------------|--------------------------|
| rs2188962  | 5          | SLC22A5     | 2.9              | 39,502                   |
| rs2858331  | 6          | HLA-DRB4    | 4.2              |                          |
| rs17582416 | 10         | CREM        | 4.3              | 128,151                  |
| rs3764147  | 13         | C13orf31    | 4.2              | 0                        |
| rs2872507  | 17         | GSDML       | 2.6              | 122,801                  |
|            |            | ORMDL3      | 20.3             | 139,249                  |

**Supplementary Table 5. Allele frequencies in all control groups for 40 loci showing at least nominal replication**

| SNP        | CHR | POS       | UK     | B/F    | NA/J   | NA/NJ  |
|------------|-----|-----------|--------|--------|--------|--------|
| rs11465804 | 1   | 67414547  | 0.0625 | 0.0848 | 0.1035 | 0.0648 |
| rs2476601  | 1   | 114089610 | 0.1081 | 0.0826 | 0.0541 | 0.0973 |
| rs2274910  | 1   | 157665119 | 0.3327 | 0.3146 | 0.3022 | 0.3241 |
| rs9286879  | 1   | 169593891 | 0.2369 | 0.2511 | 0.2565 | 0.2713 |
| rs11584383 | 1   | 197667523 | 0.3163 | 0.2691 | 0.2536 | 0.3048 |
| rs780094   | 2   | 27652888  | 0.3831 | 0.4798 | 0.5334 | 0.3954 |
| rs13003464 | 2   | 61098480  | 0.372  | 0.3884 | 0.4757 | 0.3894 |
| rs917997   | 2   | 102529086 | 0.2186 | 0.2423 | 0.2247 | 0.213  |
| rs3828309  | 2   | 233962410 | 0.4802 | 0.4497 | 0.3968 | 0.4938 |
| rs3197999  | 3   | 49696536  | 0.2578 | 0.2872 | 0.4281 | 0.2976 |
| rs4613763  | 5   | 40428485  | 0.1246 | 0.1204 | 0.0812 | 0.1226 |
| rs2188962  | 5   | 131798704 | 0.4309 | 0.4469 | 0.4248 | 0.4153 |
| rs11747270 | 5   | 150239060 | 0.0679 | 0.0886 | 0.1418 | 0.0852 |
| rs10045431 | 5   | 158747111 | 0.2979 | 0.2943 | 0.3675 | 0.3051 |
| rs17309827 | 6   | 3378317   | 0.3749 | 0.3643 | 0.3875 | 0.383  |
| rs12529198 | 6   | 5096246   | 0.0527 | 0.064  | 0.0738 | 0.0591 |
| rs6908425  | 6   | 20836710  | 0.2299 | 0.2051 | 0.2053 | 0.2168 |
| rs3763313  | 6   | 32484449  | 0.1875 | 0.1767 | 0.1734 | 0.1907 |
| rs7746082  | 6   | 106541962 | 0.2885 | 0.2746 | 0.3039 | 0.3158 |
| rs7758080  | 6   | 149618772 | 0.2718 | 0.2555 | 0.3847 | 0.2812 |
| rs2301436  | 6   | 167408399 | 0.4728 | 0.4595 | 0.4318 | 0.462  |
| rs1456893  | 7   | 50046933  | 0.3205 | 0.2992 | 0.2652 | 0.2946 |
| rs7800941  | 7   | 114534019 | 0.156  | 0.1685 | 0.1978 | 0.1768 |
| rs1551398  | 8   | 126609233 | 0.3917 | 0.4015 | 0.4083 | 0.4112 |
| rs10758669 | 9   | 4971602   | 0.3359 | 0.343  | 0.3791 | 0.3442 |
| rs4263839  | 9   | 114645994 | 0.3282 | 0.3282 | 0.2241 | 0.3058 |
| rs17582416 | 10  | 35327656  | 0.3279 | 0.3528 | 0.3887 | 0.3404 |
| rs10995271 | 10  | 64108492  | 0.387  | 0.3846 | 0.4102 | 0.4218 |
| rs11190140 | 10  | 101281583 | 0.4768 | 0.5126 | 0.5283 | 0.5066 |
| rs7927894  | 11  | 75978964  | 0.3957 | 0.3632 | 0.3896 | 0.3856 |
| rs11175593 | 12  | 38888207  | 0.0147 | 0.0191 | 0.0444 | 0.0208 |

|            |    |          |        |        |        |        |
|------------|----|----------|--------|--------|--------|--------|
| rs3764147  | 13 | 43355925 | 0.2085 | 0.2385 | 0.3694 | 0.2361 |
| rs17361350 | 16 | 61784340 | 0.3177 | 0.2752 | 0.3154 | 0.2851 |
| rs991804   | 17 | 29611838 | 0.2742 | 0.2648 | 0.2947 | 0.3083 |
| rs2872507  | 17 | 35294289 | 0.4799 | 0.4354 | 0.4301 | 0.4416 |
| rs744166   | 17 | 37767727 | 0.4387 | 0.4223 | 0.3782 | 0.4091 |
| rs2542151  | 18 | 12769947 | 0.163  | 0.1433 | 0.1062 | 0.1732 |
| rs8098673  | 18 | 17927329 | 0.3196 | 0.3397 | 0.3446 | 0.3301 |
| rs4807569  | 19 | 1074378  | 0.2015 | 0.2123 | 0.1839 | 0.214  |
| rs1736135  | 21 | 15727091 | 0.4241 | 0.4458 | 0.3394 | 0.4307 |
| rs762421   | 21 | 44439989 | 0.3925 | 0.3895 | 0.3902 | 0.3705 |

UK: WTCCC samples from the UK, B/F: Belgian/French, NA/J: North American of

Jewish descent, NA/NJ: North American of non-Jewish descent.

**Supplementary Table 6: TDT p-values for 32 replicated Crohn's loci**

| SNP        | TDT p    |
|------------|----------|
| rs11465804 | 1.67E-13 |
| rs2066847  | 4.02E-11 |
| rs4613763  | 0.000687 |
| rs3828309  | 4.11E-07 |
| rs10995271 | 4.71E-06 |
| rs2542151  | 0.0392   |
| rs11190140 | 0.000687 |
| rs11747270 | 0.000664 |
| rs2188962  | 1.17E-05 |
| rs3197999  | 0.000874 |
| rs4263839  | 0.147    |
| rs10045431 | 1.92E-06 |
| rs3764147  | 0.00219  |
| rs11175593 | 0.011    |
| rs6908425  | 0.0901   |
| rs7927894  | 0.192    |
| rs2301436  | 0.0057   |
| rs9286879  | 0.111    |
| rs11584383 | 0.00118  |
| rs2274910  | 0.00233  |
| rs2872507  | 0.00587  |
| rs1551398  | 4.07E-05 |
| rs744166   | 9.20E-05 |
| rs17582416 | 0.00379  |
| rs10758669 | 0.0057   |
| rs762421   | 0.000501 |
| rs7746082  | 0.00199  |
| rs1736135  | 0.0548   |
| rs1456893  | 0.0183   |
| rs2476601  | 0.063    |
| rs4807569  | 0.000104 |
| rs3763313  | 0.472    |

## Supplementary Note

### WTCCC Authors

**Management Committee:** Paul R Burton<sup>1</sup>, David G Clayton<sup>2</sup>, Lon R Cardon<sup>3</sup>, Nick Craddock<sup>4</sup>, Panos Deloukas<sup>5</sup>, Audrey Duncanson<sup>6</sup>, Dominic P Kwiatkowski<sup>3,5</sup>, Mark I McCarthy<sup>3,7</sup>, Willem H Ouwehand<sup>8,9</sup>, Nilesh J Samani<sup>10</sup>, John A Todd<sup>2</sup>, Peter Donnelly (Chair)<sup>11</sup>

**Analysis Committee:** Jeffrey C Barrett<sup>3</sup>, Paul R Burton<sup>1</sup>, Dan Davison<sup>11</sup>, Peter Donnelly<sup>11</sup>, Doug Easton<sup>12</sup>, David Evans<sup>3</sup>, Hin-Tak Leung<sup>2</sup>, Jonathan L Marchini<sup>11</sup>, Andrew P Morris<sup>3</sup>, Chris CA Spencer<sup>11</sup>, Martin D Tobin<sup>1</sup>, Lon R Cardon (Co-chair)<sup>3</sup>, David G Clayton (Co-chair)<sup>2</sup>

**UK Blood Services & University of Cambridge Controls:** Antony P Attwood<sup>5,8</sup>, James P Boorman<sup>8,9</sup>, Barbara Cant<sup>8</sup>, Ursula Everson<sup>13</sup>, Judith M Hussey<sup>14</sup>, Jennifer D Jolley<sup>8</sup>, Alexandra S Knight<sup>8</sup>, Kerstin Koch<sup>8</sup>, Elizabeth Meech<sup>15</sup>, Sarah Nutland<sup>2</sup>, Christopher V Prowse<sup>16</sup>, Helen E Stevens<sup>2</sup>, Niall C Taylor<sup>8</sup>, Graham R Walters<sup>17</sup>, Neil M Walker<sup>2</sup>, Nicholas A Watkins<sup>8,9</sup>, Thilo Winzer<sup>8</sup>, John A Todd<sup>2</sup>, Willem H Ouwehand<sup>8,9</sup>

**1958 Birth Cohort Controls:** Richard W Jones<sup>18</sup>, Wendy L McArdle<sup>18</sup>, Susan M Ring<sup>18</sup>, David P Strachan<sup>19</sup>, Marcus Pembrey<sup>18,20</sup>

**Bipolar Disorder (Aberdeen):** Gerome Breen<sup>21</sup>, David St Clair<sup>21</sup>;

**(Birmingham):** Sian Caesar<sup>22</sup>, Katherine Gordon-Smith<sup>22,23</sup>, Lisa Jones<sup>22</sup>;

**(Cardiff):** Christine Fraser<sup>23</sup>, Elaine K Green<sup>23</sup>, Detelina Grozeva<sup>23</sup>, Marian L Hamshere<sup>23</sup>, Peter A Holmans<sup>23</sup>, Ian R Jones<sup>23</sup>, George Kirov<sup>23</sup>, Valentina Moskvina<sup>23</sup>, Ivan Nikolov<sup>23</sup>, Michael C O'Donovan<sup>23</sup>, Michael J Owen<sup>23</sup>, Nick Craddock<sup>23</sup>; **(London):** David A Collier<sup>24</sup>, Amanda Elkin<sup>24</sup>, Anne Farmer<sup>24</sup>, Richard Williamson<sup>24</sup>, Peter McGuffin<sup>24</sup>; **(Newcastle):** Allan H Young<sup>25</sup>, I Nicol Ferrier<sup>25</sup>

**Coronary Artery Disease (Leeds):** Stephen G Ball<sup>26</sup>, Anthony J Balmforth<sup>26</sup>, Jennifer H Barrett<sup>26</sup>, D Timothy Bishop<sup>26</sup>, Mark M Iles<sup>26</sup>, Azhar Maqbool<sup>26</sup>, Nadira Yuldasheva<sup>26</sup>, Alistair S Hall<sup>26</sup>; **(Leicester):** Peter S Braund<sup>10</sup>, Paul R Burton<sup>1</sup>, Richard J Dixon<sup>10</sup>, Massimo Mangino<sup>10</sup>, Suzanne Stevens<sup>10</sup>, Martin D Tobin<sup>1</sup>, John R Thompson<sup>1</sup>, Nilesh J Samani<sup>10</sup>

**Crohn Disease (Cambridge):** Francesca Bredin<sup>27</sup>, Mark Tremelling<sup>27</sup>, Miles Parkes<sup>27</sup>; **(Edinburgh):** Hazel Drummond<sup>28</sup>, Charles W Lees<sup>28</sup>, Elaine R Nimmo<sup>28</sup>, Jack Satsangi<sup>28</sup>; **(London):** Sheila A Fisher<sup>29</sup>, Alastair Forbes<sup>30</sup>, Cathryn M Lewis<sup>29</sup>, Clive M Onnie<sup>29</sup>, Natalie J Prescott<sup>29</sup>, Jeremy Sanderson<sup>31</sup>, Christopher G Mathew<sup>29</sup>; **(Newcastle):** Jamie Barbour<sup>32</sup>, M Khalid Mohiuddin<sup>32</sup>, Catherine E Todhunter<sup>32</sup>, John C Mansfield<sup>32</sup>; **(Oxford):** Tariq Ahmad<sup>33</sup>, Fraser R Cummings<sup>33</sup>, Derek P Jewell<sup>33</sup>

**Hypertension (Aberdeen):** John Webster<sup>34</sup>; **(Cambridge):** Morris J Brown<sup>35</sup>, David G Clayton<sup>2</sup>; **(Evry, France):** G Mark Lathrop<sup>36</sup>; **(Glasgow):** John Connell<sup>37</sup>, Anna Dominiczak<sup>37</sup>; **(Leicester):** Nilesh J Samani<sup>10</sup>; **(London):** Carolina A Braga Marcano<sup>38</sup>, Beverley Burke<sup>38</sup>, Richard Dobson<sup>38</sup>, Johannie Gungadoo<sup>38</sup>, Kate L Lee<sup>38</sup>, Patricia B Munroe<sup>38</sup>, Stephen J Newhouse<sup>38</sup>, Abiodun

Onipinla<sup>38</sup>, Chris Wallace<sup>38</sup>, Mingzhan Xue<sup>38</sup>, Mark Caulfield<sup>38</sup>; **(Oxford)**: Martin Farrall<sup>39</sup>

**Rheumatoid Arthritis**: Anne Barton<sup>40</sup>, The Biologics in RA Genetics and Genomics Study Syndicate (BRAGGS) Steering Committee\*, Ian N Bruce<sup>40</sup>, Hannah Donovan<sup>40</sup>, Steve Eyre<sup>40</sup>, Paul D Gilbert<sup>40</sup>, Samantha L Hider<sup>40</sup>, Anne M Hinks<sup>40</sup>, Sally L John<sup>40</sup>, Catherine Potter<sup>40</sup>, Alan J Silman<sup>40</sup>, Deborah PM Symmons<sup>40</sup>, Wendy Thomson<sup>40</sup>, Jane Worthington<sup>40</sup>

**Type 1 Diabetes**: David G Clayton<sup>2</sup>, David B Dunger<sup>2,41</sup>, Sarah Nutland<sup>2</sup>, Helen E Stevens<sup>2</sup>, Neil M Walker<sup>2</sup>, Barry Widmer<sup>2,41</sup>, John A Todd<sup>2</sup>

**Type 2 Diabetes (Exeter)**: Timothy M Frayling<sup>42,43</sup>, Rachel M Freathy<sup>42,43</sup>, Hana Lango<sup>42,43</sup>, John R B Perry<sup>42,43</sup>, Beverley M Shields<sup>43</sup>, Michael N Weedon<sup>42,43</sup>, Andrew T Hattersley<sup>42,43</sup>; **(London)**: Graham A Hitman<sup>44</sup>; **(Newcastle)**: Mark Walker<sup>45</sup>; **(Oxford)**: Kate S Elliott<sup>3,7</sup>, Christopher J Groves<sup>7</sup>, Cecilia M Lindgren<sup>3,7</sup>, Nigel W Rayner<sup>3,7</sup>, Nicholas J Timpson<sup>3,46</sup>, Eleftheria Zeggini<sup>3,7</sup>, Mark I McCarthy<sup>3,7</sup>

**Tuberculosis (Gambia)**: Melanie Newport<sup>47</sup>, Giorgio Sirugo<sup>47</sup>; **(Oxford)**: Emily Lyons<sup>3</sup>, Fredrik Vannberg<sup>3</sup>, Adrian VS Hill<sup>3</sup>

**Ankylosing Spondylitis**: Linda A Bradbury<sup>48</sup>, Claire Farrar<sup>49</sup>, Jennifer J Pointon<sup>48</sup>, Paul Wordsworth<sup>49</sup>, Matthew A Brown<sup>48,49</sup>

**Autoimmune Thyroid Disease**: Jayne A Franklyn<sup>50</sup>, Joanne M Heward<sup>50</sup>, Matthew J Simmonds<sup>50</sup>, Stephen CL Gough<sup>50</sup>

**Breast Cancer**: Sheila Seal<sup>51</sup>, Breast Cancer Susceptibility Collaboration (UK)\*, Michael R Stratton<sup>51,52</sup>, Nazneen Rahman<sup>51</sup>

**Multiple Sclerosis**: Maria Ban<sup>53</sup>, An Goris<sup>53</sup>, Stephen J Sawcer<sup>53</sup>, Alastair Compston<sup>53</sup>

**Gambian Controls (Gambia)**: David Conway<sup>47</sup>, Muminatou Jallow<sup>47</sup>, Melanie Newport<sup>47</sup>, Giorgio Sirugo<sup>47</sup>; **(Oxford)**: Kirk A Rockett<sup>3</sup>, Dominic P Kwiatkowski<sup>3,5</sup>

**DNA, Genotyping, Data QC and Informatics (Wellcome Trust Sanger Institute, Hinxton)**: Claire Bryan<sup>5</sup>, Suzannah J Bumpstead<sup>5</sup>, Amy Chaney<sup>5</sup>, Kate Downes<sup>2,5</sup>, Jilur Ghorl<sup>5</sup>, Rhian Gwilliam<sup>5</sup>, Sarah E Hunt<sup>5</sup>, Michael Inouye<sup>5</sup>, Andrew Keniry<sup>5</sup>, Emma King<sup>5</sup>, Ralph McGinnis<sup>5</sup>, Simon Potter<sup>5</sup>, Rathi Ravindrarajah<sup>5</sup>, Pamela Whittaker<sup>5</sup>, David Withers<sup>5</sup>, Panos Deloukas<sup>5</sup>; **(Cambridge)**: Hin-Tak Leung<sup>2</sup>, Sarah Nutland<sup>2</sup>, Helen E Stevens<sup>2</sup>, Neil M Walker<sup>2</sup>, John A Todd<sup>2</sup>

**Statistics (Cambridge)**: Doug Easton<sup>12</sup>, David G Clayton<sup>2</sup>; **(Leicester)**: Paul R Burton<sup>1</sup>, Martin D Tobin<sup>1</sup>; **(Oxford)**: Jeffrey C Barrett<sup>3</sup>, David Evans<sup>3</sup>, Andrew P Morris<sup>3</sup>, Lon R Cardon<sup>3</sup>; **(Oxford)**: Niall J Cardin<sup>11</sup>, Dan Davison<sup>11</sup>, Teresa Ferreira<sup>11</sup>, Joanne Pereira-Gale<sup>11</sup>, Ingeleif B Hallgrimsdóttir<sup>11</sup>, Bryan N Howie<sup>11</sup>, Jonathan L Marchini<sup>11</sup>, Chris CA Spencer<sup>11</sup>, Zhan Su<sup>11</sup>, Yik Ying Teo<sup>3,11</sup>, Damjan Vukcevic<sup>11</sup>, Peter Donnelly<sup>11</sup>

**PIs**: David Bentley<sup>5,54</sup>, Matthew A Brown<sup>48,49</sup>, Lon R Cardon<sup>3</sup>, Mark Caulfield<sup>38</sup>, David G Clayton<sup>2</sup>, Alistair Compston<sup>53</sup>, Nick Craddock<sup>23</sup>, Panos Deloukas<sup>5</sup>, Peter Donnelly<sup>11</sup>, Martin Farrall<sup>39</sup>, Stephen CL Gough<sup>50</sup>, Alistair S Hall<sup>26</sup>, Andrew T Hattersley<sup>42,43</sup>, Adrian VS Hill<sup>3</sup>, Dominic P Kwiatkowski<sup>3,5</sup>, Christopher G Mathew<sup>29</sup>, Mark I McCarthy<sup>3,7</sup>, Willem H Ouwehand<sup>8,9</sup>, Miles Parkes<sup>27</sup>, Marcus

Pembrey<sup>18,20</sup>, Nazneen Rahman<sup>51</sup>, Nilesh J Samani<sup>10</sup>, Michael R Stratton<sup>51,52</sup>,  
John A Todd<sup>2</sup>, Jane Worthington<sup>40</sup>

<sup>1</sup> Genetic Epidemiology Group, Department of Health Sciences, University of Leicester, Adrian Building, University Road, Leicester, LE1 7RH, UK; <sup>2</sup> Juvenile Diabetes Research Foundation/Wellcome Trust Diabetes and Inflammation Laboratory, Department of Medical Genetics, Cambridge Institute for Medical Research, University of Cambridge, Wellcome Trust/MRC Building, Cambridge, CB2 0XY, UK; <sup>3</sup> Wellcome Trust Centre for Human Genetics, University of Oxford, Roosevelt Drive, Oxford OX3 7BN, UK; <sup>4</sup> Department of Psychological Medicine, Henry Wellcome Building, School of Medicine, Cardiff University, Heath Park, Cardiff CF14 4XN, UK; <sup>5</sup> The Wellcome Trust Sanger Institute, Wellcome Trust Genome Campus, Hinxton, Cambridge CB10 1SA, UK; <sup>6</sup> The Wellcome Trust, Gibbs Building, 215 Euston Road, London NW1 2BE, UK; <sup>7</sup> Oxford Centre for Diabetes, Endocrinology and Medicine, University of Oxford, Churchill Hospital, Oxford, OX3 7LJ, UK; <sup>8</sup> Department of Haematology, University of Cambridge, Long Road, Cambridge, CB2 2PT, UK; <sup>9</sup> National Health Service Blood and Transplant, Cambridge Centre, Long Road, Cambridge, CB2 2PT, UK; <sup>10</sup> Department of Cardiovascular Sciences, University of Leicester, Glenfield Hospital, Groby Road, Leicester, LE3 9QP, UK; <sup>11</sup> Department of Statistics, University of Oxford, 1 South Parks Road, Oxford OX1 3TG, UK; <sup>12</sup> Cancer Research UK Genetic Epidemiology Unit, Strangeways Research Laboratory, Worts Causeway, Cambridge CB1 8RN, UK; <sup>13</sup> National Health Service Blood and Transplant, Sheffield Centre, Longley Lane, Sheffield S5 7JN, UK; <sup>14</sup> National Health Service Blood and Transplant, Brentwood Centre, Crescent Drive, Brentwood, CM15 8DP, UK; <sup>15</sup> The Welsh Blood Service, Ely Valley Road, Talbot Green, Pontyclun, CF72 9WB, UK; <sup>16</sup> The Scottish National Blood Transfusion Service, Ellen's Glen Road, Edinburgh, EH17 7QT, UK; <sup>17</sup> National Health Service Blood and Transplant, Southampton Centre, Coxford Road, Southampton, SO16 5AF, UK; <sup>18</sup> Avon Longitudinal Study of Parents and Children, University of Bristol, 24 Tyndall Avenue, Bristol, BS8 1TQ, UK; <sup>19</sup> Division of Community Health Services, St George's University of London, Cranmer Terrace, London SW17 0RE, UK; <sup>20</sup> Institute of Child Health, University College London, 30 Guilford St, London WC1N 1EH, UK; <sup>21</sup> University of Aberdeen, Institute of Medical Sciences, Foresterhill, Aberdeen, AB25 2ZD, UK; <sup>22</sup> Department of Psychiatry, Division of Neuroscience, Birmingham University, Birmingham, B15 2QZ, UK; <sup>23</sup> Department of Psychological Medicine, Henry Wellcome Building, School of Medicine, Cardiff University, Heath Park, Cardiff CF14 4XN, UK; <sup>24</sup> SGDP, The Institute of Psychiatry, King's College London, De Crespigny Park Denmark Hill London SE5 8AF, UK; <sup>25</sup> School of Neurology, Neurobiology and Psychiatry, Royal Victoria Infirmary, Queen Victoria Road, Newcastle upon Tyne, NE1 4LP, UK; <sup>26</sup> LIGHT and LImm Research Institutes, Faculty of Medicine and Health, University of Leeds, Leeds, LS1 3EX, UK; <sup>27</sup> IBD Research Group, Addenbrooke's Hospital, University of Cambridge, Cambridge, CB2 2QQ, UK; <sup>28</sup> Gastrointestinal Unit, School of Molecular and Clinical Medicine, University of Edinburgh, Western General Hospital, Edinburgh EH4 2XU UK; <sup>29</sup> Department of Medical & Molecular Genetics, King's College London School of Medicine, 8th Floor Guy's Tower, Guy's Hospital, London, SE1 9RT, UK; <sup>30</sup> Institute for Digestive Diseases, University College London Hospitals Trust, London, NW1 2BU, UK; <sup>31</sup> Department of Gastroenterology, Guy's and St Thomas' NHS Foundation Trust, London, SE1 7EH, UK; <sup>32</sup> Department of Gastroenterology & Hepatology, University of Newcastle upon Tyne, Royal Victoria Infirmary, Newcastle upon Tyne, NE1 4LP, UK; <sup>33</sup> Gastroenterology Unit, Radcliffe Infirmary, University of Oxford, Oxford, OX2 6HE, UK; <sup>34</sup> Medicine and Therapeutics, Aberdeen Royal Infirmary, Foresterhill, Aberdeen, Grampian AB9 2ZB, UK; <sup>35</sup> Clinical Pharmacology Unit and the Diabetes and Inflammation Laboratory, University of Cambridge, Addenbrookes Hospital, Hills Road, Cambridge CB2 2QQ, UK; <sup>36</sup> Centre National de Genotypage, 2, Rue Gaston Cremieux, Evry, Paris 91057.; <sup>37</sup> BHF Glasgow Cardiovascular Research Centre, University of Glasgow, 126 University Place, Glasgow, G12 8TA, UK; <sup>38</sup> Clinical Pharmacology and Barts and The London Genome Centre, William Harvey Research Institute, Barts and The London, Queen Mary's School of Medicine, Charterhouse Square, London EC1M 6BQ, UK; <sup>39</sup> Cardiovascular Medicine, University of Oxford, Wellcome Trust Centre for Human Genetics, Roosevelt Drive, Oxford OX3 7BN, UK; <sup>40</sup> arc Epidemiology Research Unit, University of Manchester, Stopford Building, Oxford Rd, Manchester, M13 9PT, UK; <sup>41</sup> Department of Paediatrics, University of Cambridge, Addenbrooke's Hospital, Cambridge, CB2 2QQ, UK; <sup>42</sup> Genetics of Complex Traits, Institute of Biomedical and Clinical Science, Peninsula Medical School, Magdalen Road, Exeter EX1 2LU UK; <sup>43</sup> Diabetes Genetics, Institute of Biomedical and Clinical Science, Peninsula Medical School, Barrack Road, Exeter EX2 5DU UK; <sup>44</sup> Centre for Diabetes and Metabolic Medicine, Barts and The London, Royal London Hospital, Whitechapel, London, E1 1BB UK; <sup>45</sup> Diabetes Research Group, School of Clinical Medical Sciences, Newcastle University, Framlington Place, Newcastle upon Tyne NE2 4HH, UK; <sup>46</sup> The MRC Centre for Causal Analyses in Translational Epidemiology, Bristol University, Canynge Hall, Whiteladies Rd, Bristol BS2 8PR, UK; <sup>47</sup> MRC Laboratories, Fajara, The Gambia; <sup>48</sup> Diamantina Institute for Cancer, Immunology and Metabolic Medicine, Princess Alexandra Hospital, University of Queensland, Woolloongabba, Qld 4102, Australia; <sup>49</sup> Botnar Research Centre, University of Oxford, Headington, Oxford OX3 7BN, UK; <sup>50</sup> Department of Medicine, Division of Medical Sciences, Institute of Biomedical Research,

University of Birmingham, Edgbaston, Birmingham B15 2TT, UK;<sup>51</sup> Section of Cancer Genetics, Institute of Cancer Research, 15 Cotswold Road, Sutton, SM2 5NG, UK;<sup>52</sup> Cancer Genome Project, The Wellcome Trust Sanger Institute, Wellcome Trust Genome Campus, Hinxton, Cambridge CB10 1SA, UK;<sup>53</sup> Department of Clinical Neurosciences, University of Cambridge, Addenbrooke's Hospital, Hills Road, Cambridge CB2 2QQ, UK;<sup>54</sup> PRESENT ADDRESS: Illumina Cambridge, Chesterford Research Park, Little Chesterford, Nr Saffron Walden, Essex, CB10 1XL, UK.



**Supplemental Figure 1: (A-E)** Boxplots of gene (probe average) expression levels by genotype for the eQTL effects reported in Table 4. Respective gene and SNP identifiers are given for each graph. Numbers of individuals of a given genotype are given in parentheses. Data are from Dixon et al. (2007).

**(F-G)** Blue bar graphs: Frequency distribution of number of genes with lod scores  $> 2$  (**F**), and sum of lod scores  $> 2$  (**G**) for 1,000 sets of 39 SNPs matching the true SNP set in terms of allelic frequency and gene context. Red bar graphs: cfr. blue bar graph, except that associated intergenic SNPs were replaced by intronic SNPs in the simulations to increase their proximity to genes. Red arrows: corresponding values obtained with the 39 CD associated SNPs.

**A****SLC22A5 / rs2188962**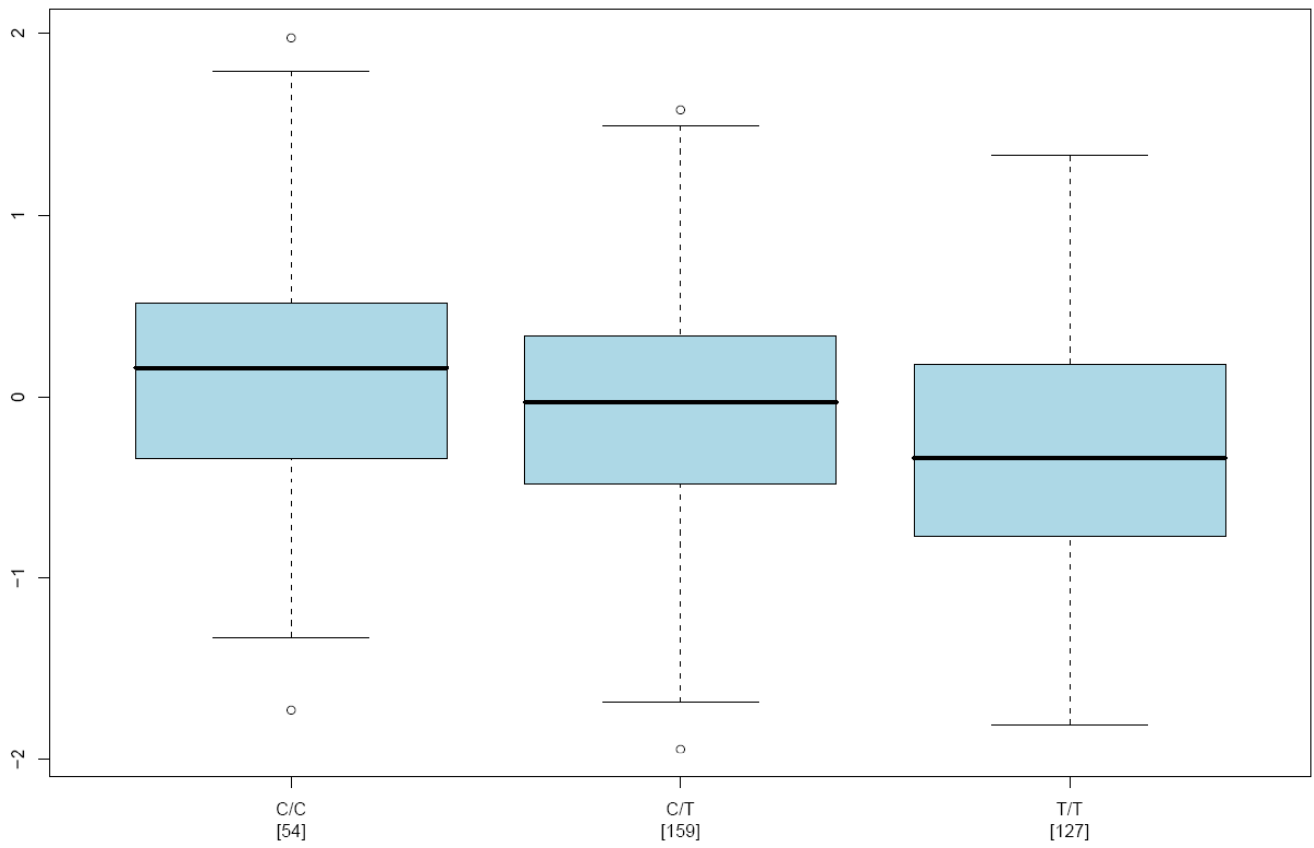**B****HLA-DRB4 / rs2858331**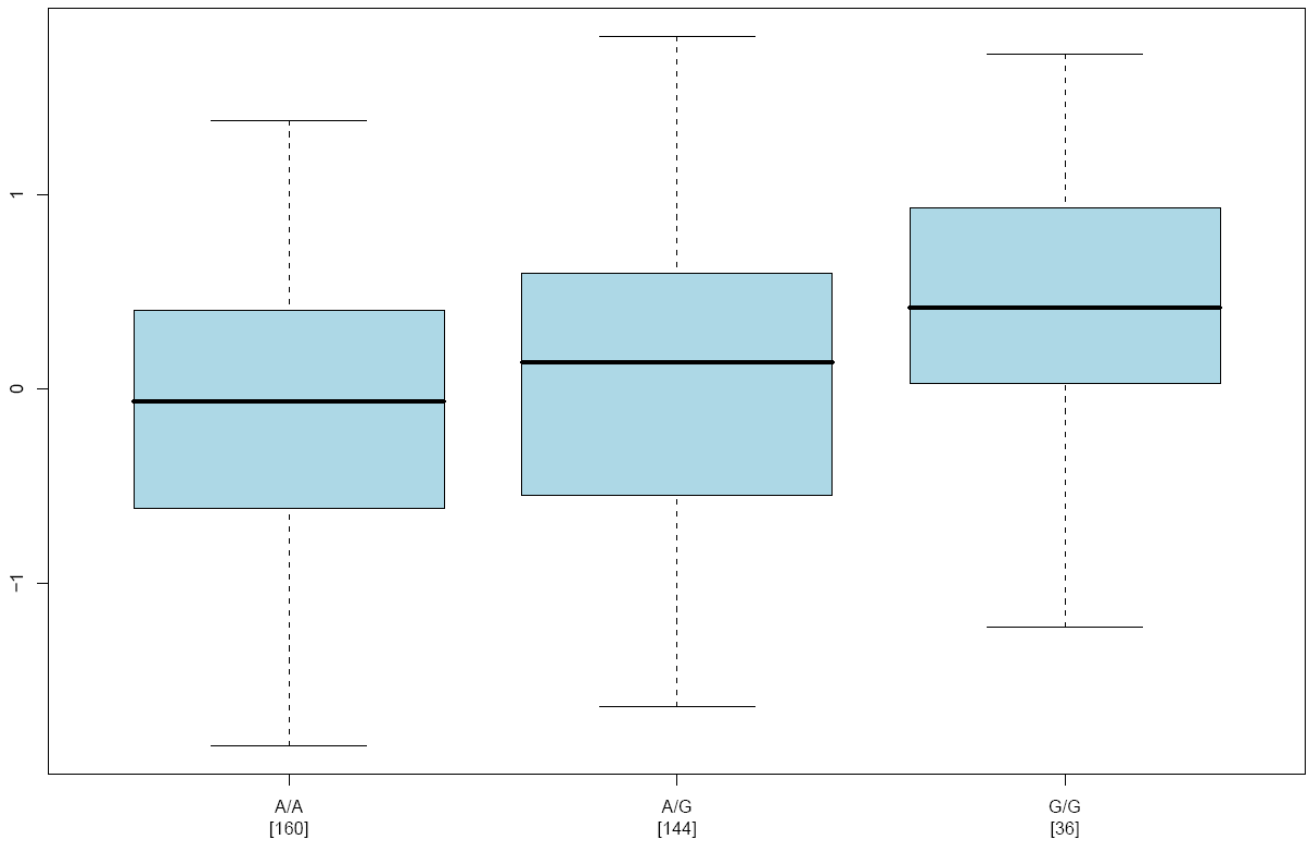

**C****CREM / rs17582416**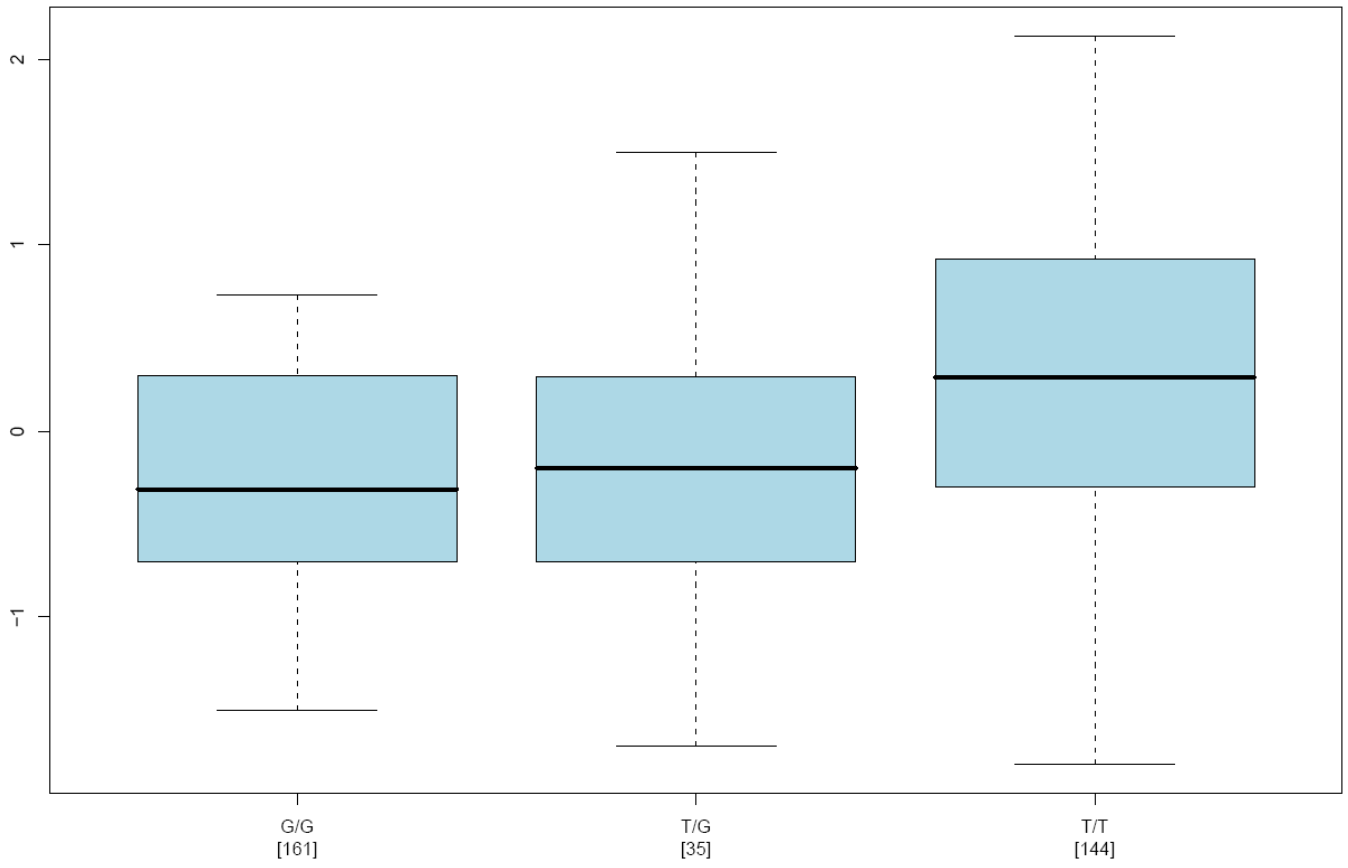**D****GSDML / rs2872507**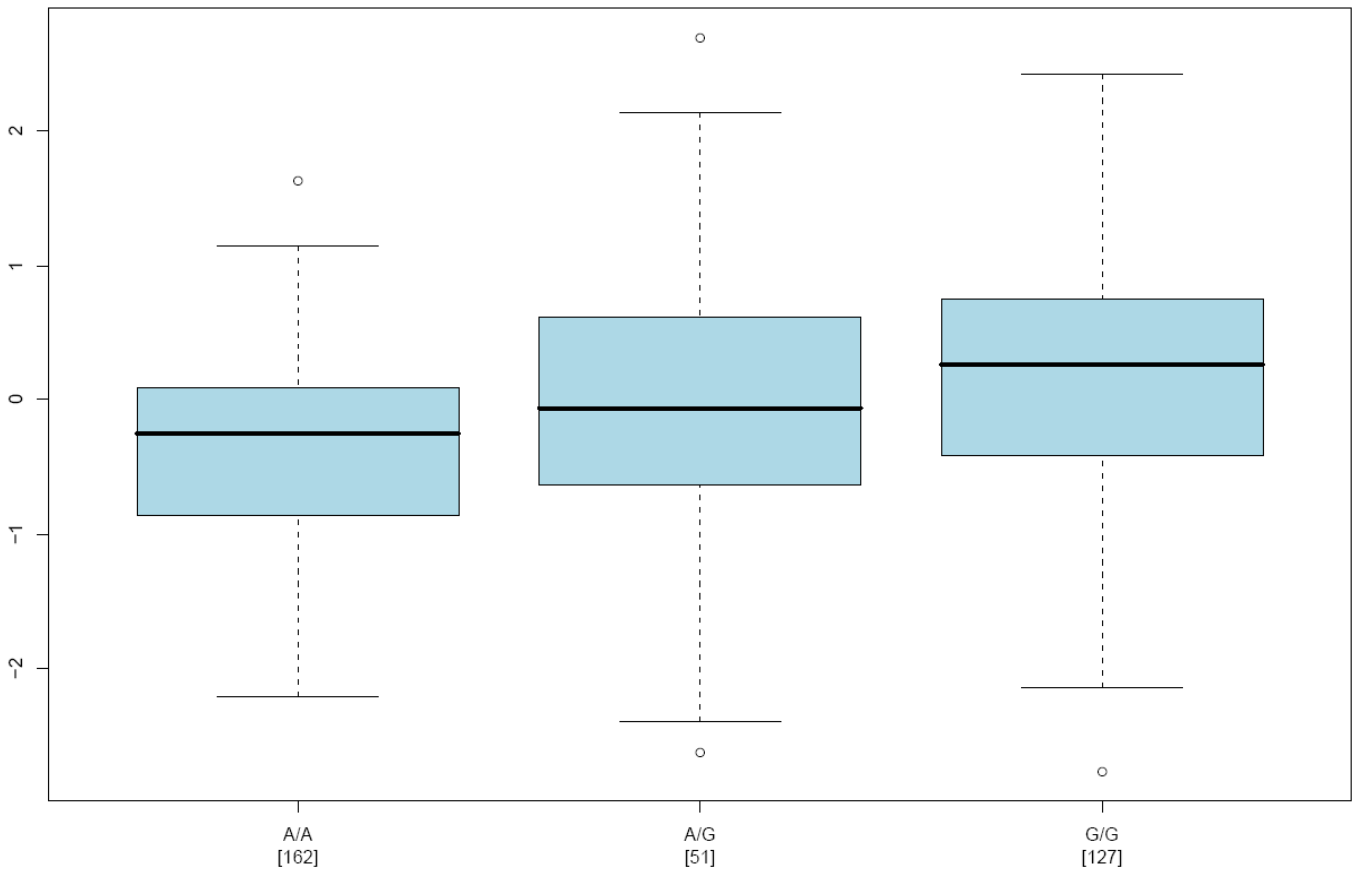

E

ORMDL3 / rs2872507

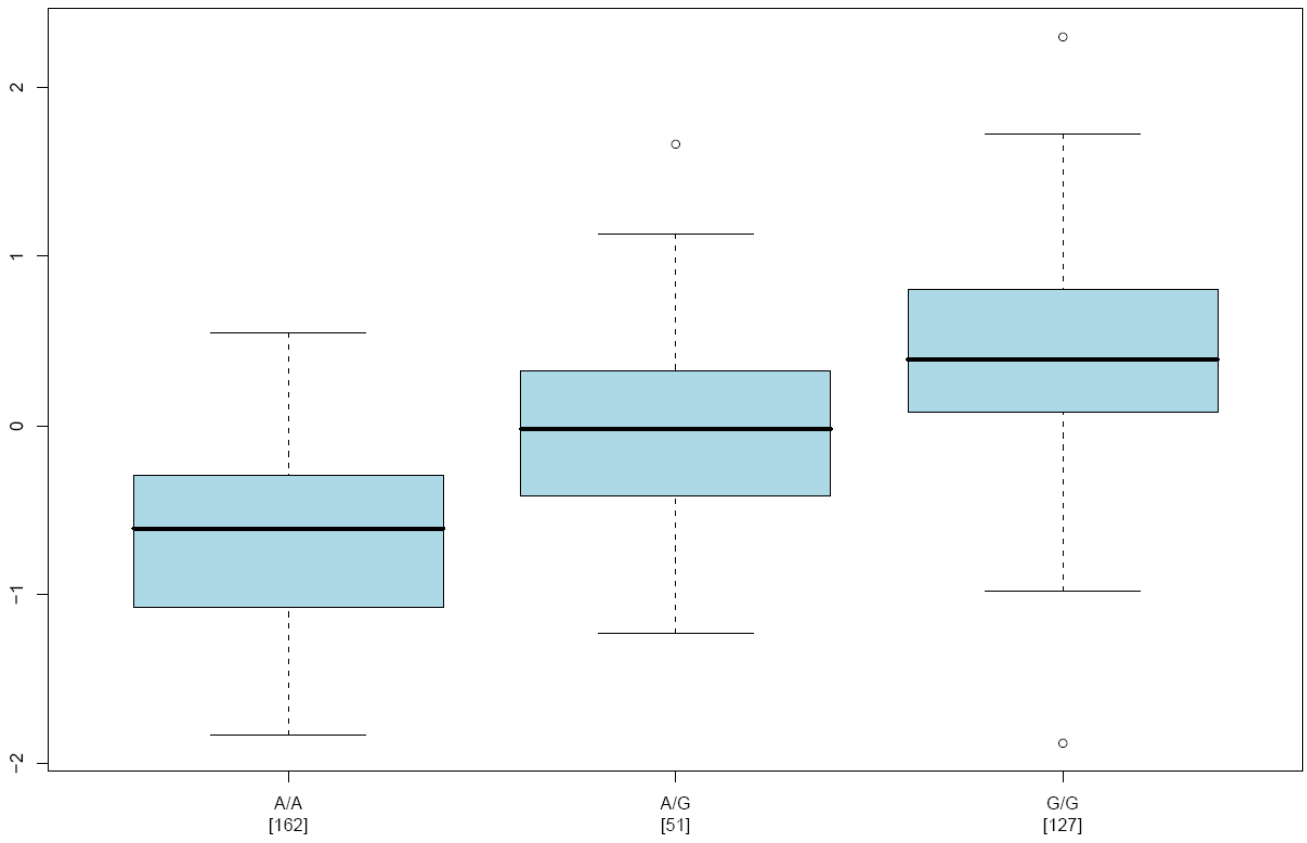

**F**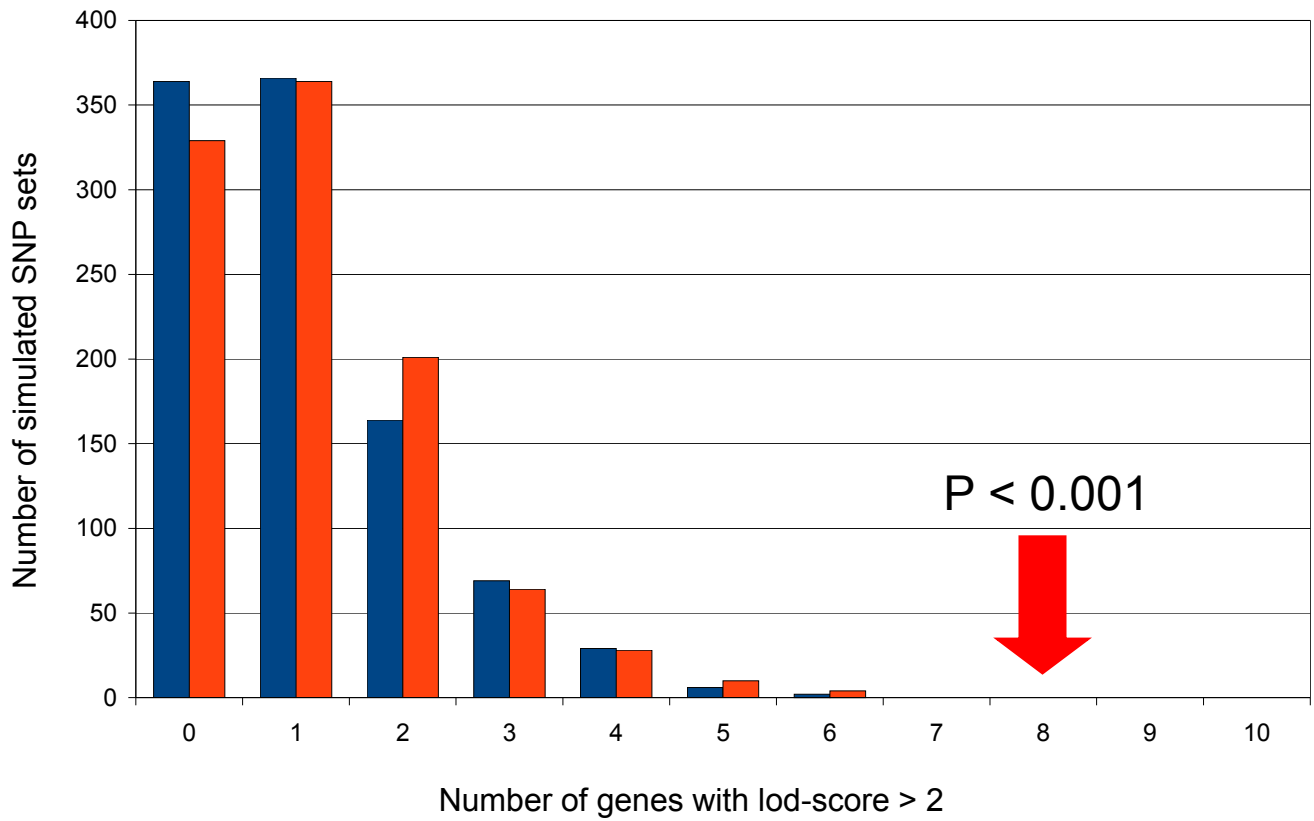**G**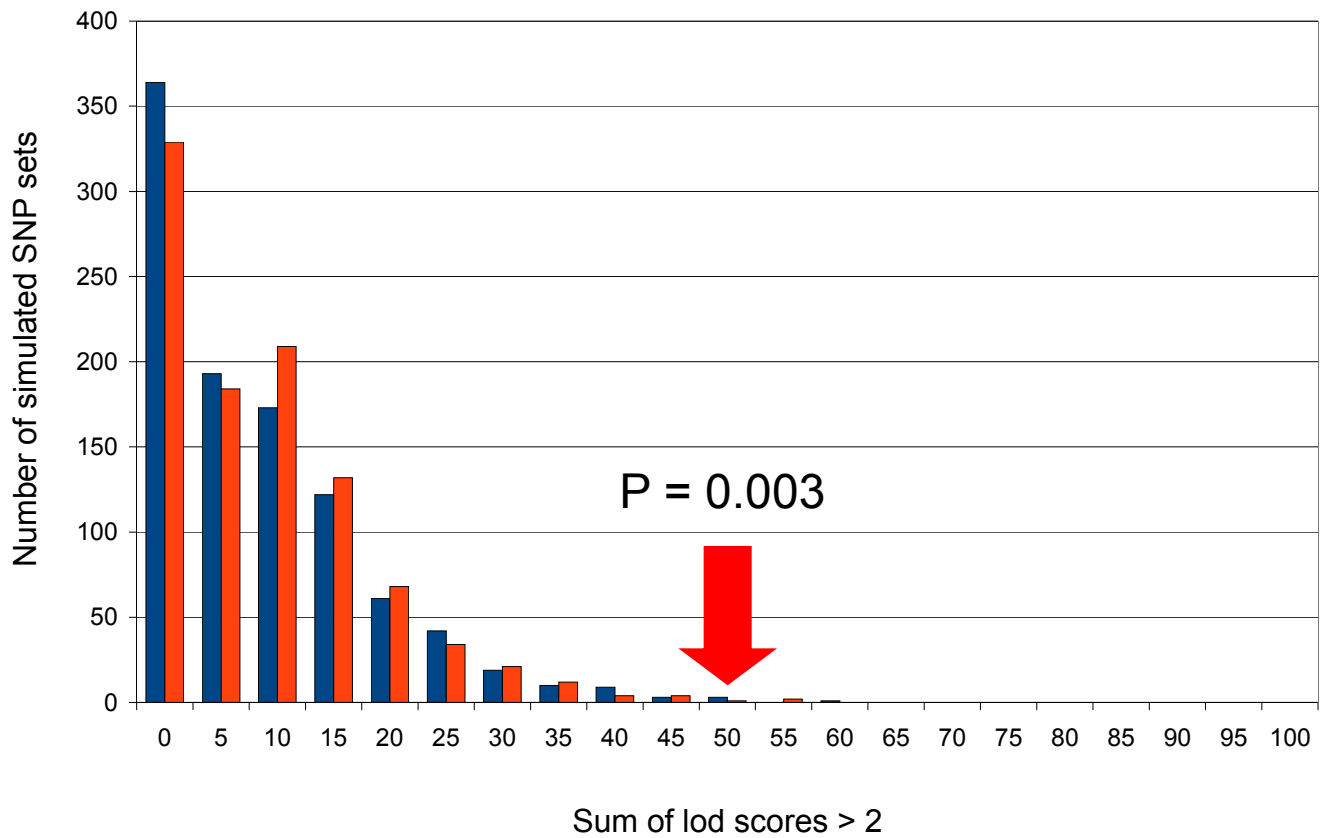

**Supplementary Figure 2:** Ideogram showing chromosomal location of significant loci for Crohn's disease identified in genome wide association scan meta-analysis, and major regions of linkage for inflammatory bowel disease detected by whole genome linkage scans. *Arrows* indicate significant loci identified from present genome wide association meta-analysis and replication, *numbered* as ordered per Table 2. *Red bars* indicate regions significant linkage and *blue bars* suggestive linkage. *MHC*, major histocompatibility complex. Regions where association and linkage findings coincide are chromosomes 1p, 3p, 5q, 6p, 10p, 12q, and 16q. Figure is modified and linkage data is compiled from review by CG Mathew and CM Lewis, Genetics of inflammatory bowel disease: progress and prospects Hum. Mol. Genet., 2004; 13: R161 - R168, with inclusion of inflammatory bowel disease linkage data from three more recent linkage studies (Barmada M.M. et al., A Genome Scan in 260 Inflammatory Bowel Disease-Affected Relative Pairs. Inflamm Bowel Dis, **10**, 15-22 (2004); Vermeire S. et al. Genome wide scan in a Flemish inflammatory bowel disease population: support for the IBD4 locus, population heterogeneity, and epistasis. Gut **53**, 980–986, (2004); and Shugart Y.Y. et al An SNP linkage scan identifies significant Crohn's disease loci on chromosomes 13q13.3 and, in Jewish families, on 1p35.2 and 3q29. Genes and Immunity, In Press).

### Comparison of Association Loci with Published Linkage Loci

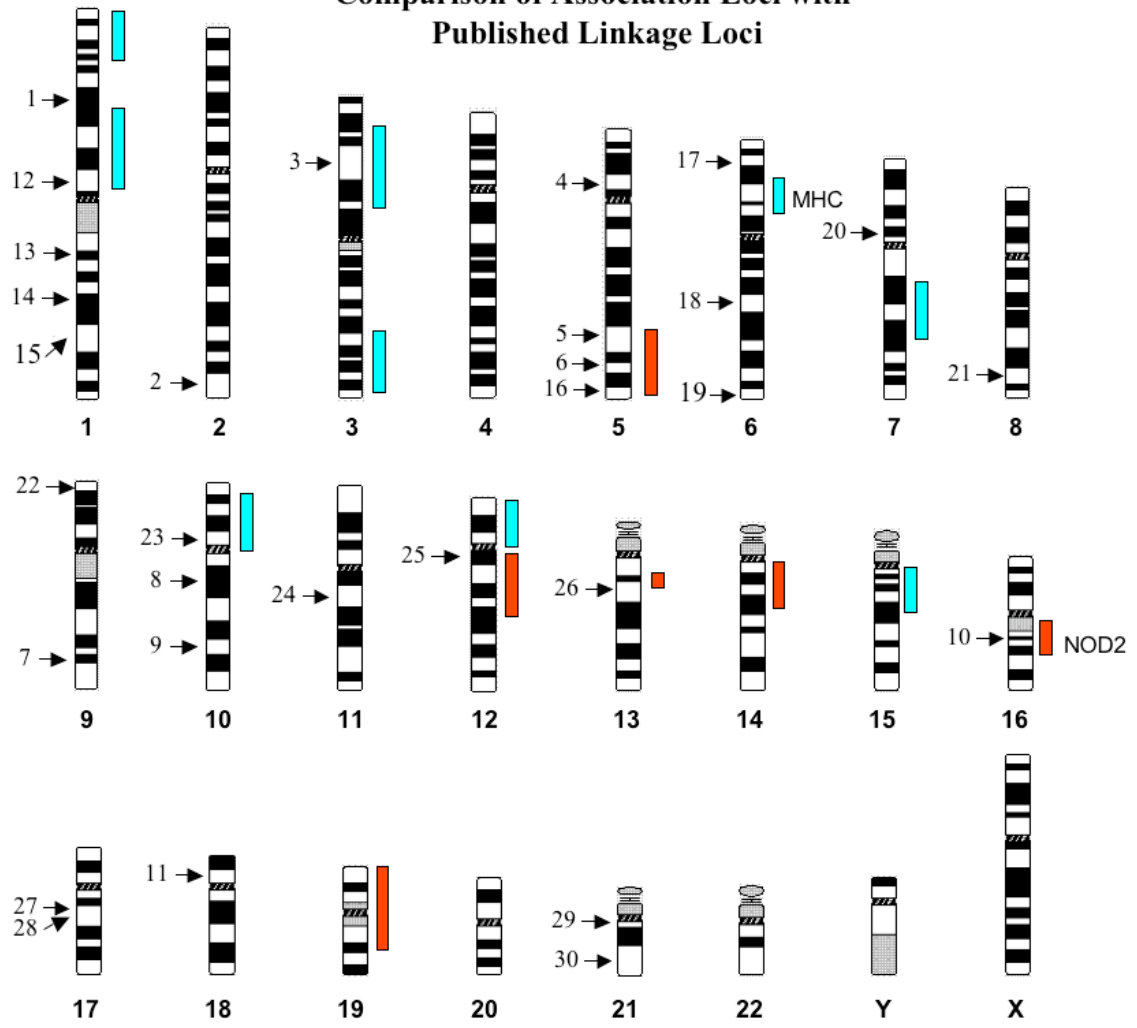

Supplement: 41588_2008_BFng175_MOESM5_ESM.pdf [file 41588_2008_BFng175_MOESM5_ESM.pdf]
